# Supplementary material
Source: PubMed Central journal article supplement (PMC3292299)
Supplement: cr2011137x1.pdf [file cr2011137x1.pdf]

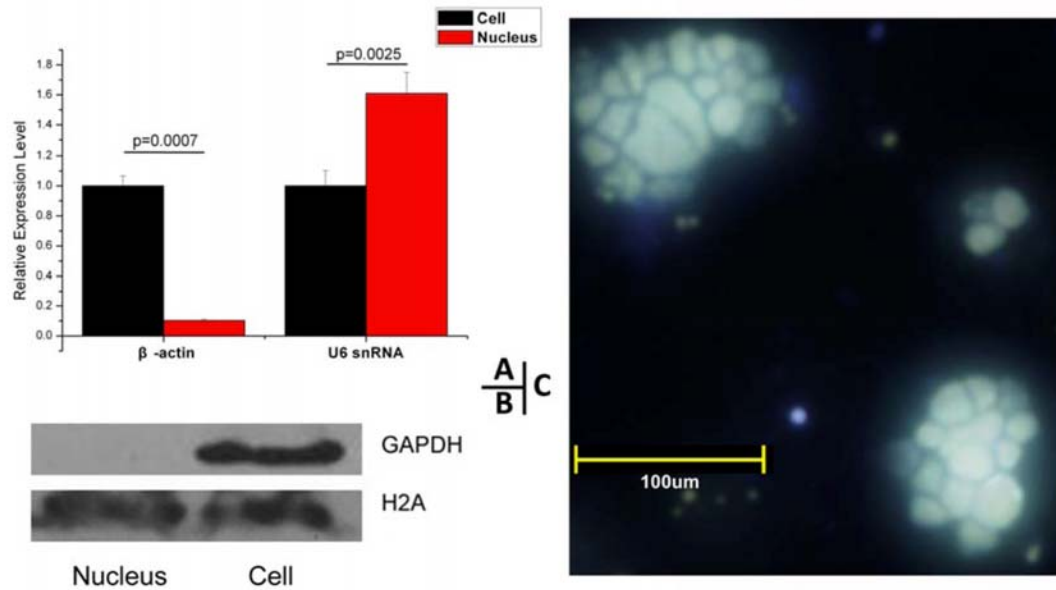

**Supplementary information, Figure S1** Assess purity and integrity of nucleus fraction **A**, Relative enrichment of RNA markers in purified nucleus fraction, equal amount of total RNA was loaded for nucleus and cell extractions. **B**, Relative enrichment of protein markers in purified nucleus fraction, equal amount of total protein was loaded for nucleus and cell extractions. **C** Integrity of purified nucleus under fluorescence microscope (Hoechst 33258). Bar, 100 $\mu$ m.
