# Supplementary material
Source: PubMed Central journal article supplement (PMC3292299)
Supplement: cr2011137x3.pdf [file cr2011137x3.pdf]

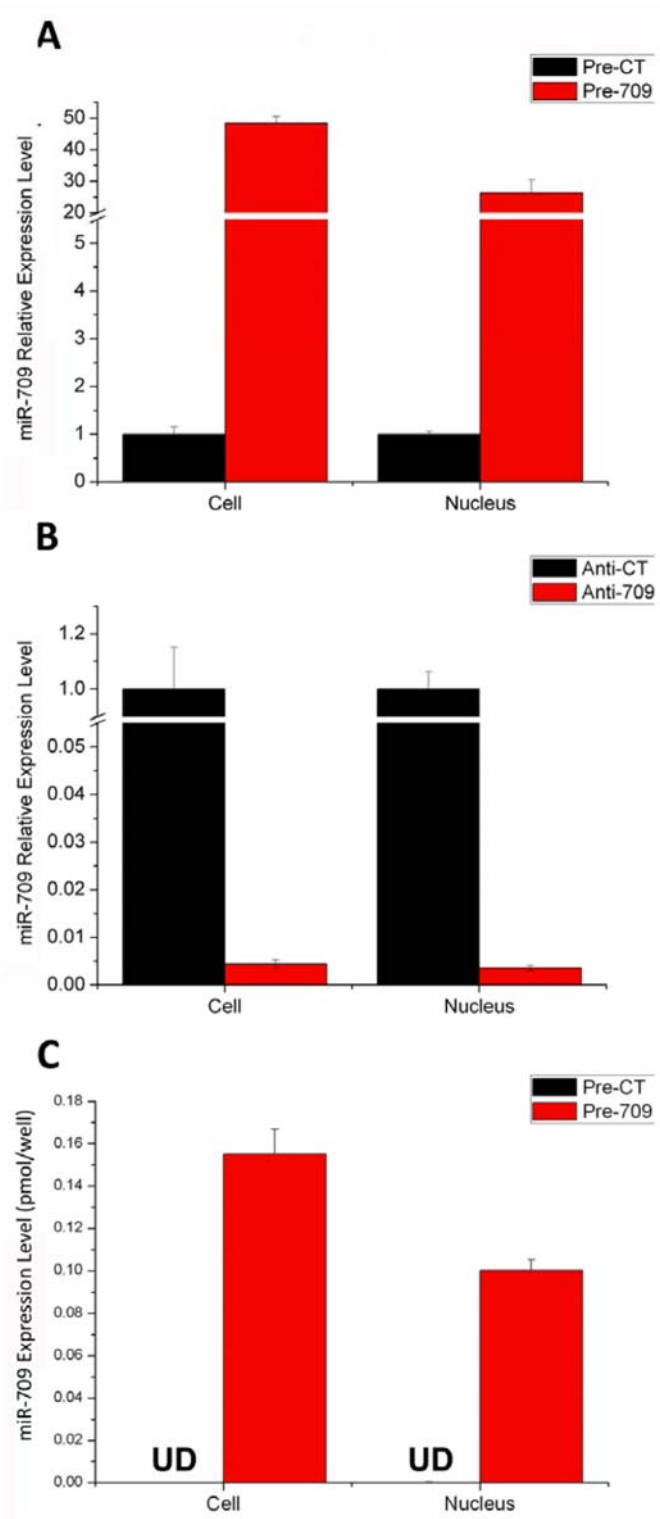

**Supplementary information, Figure S3** Exogenous miR-709 precursor or antisense impact miR-709 nucleus fraction both in mouse and human.

**A**, miR-709 precursor up regulates miR-709 in nucleus in L929 cells. **B**, miR-709 antisense knocks down miR-709 in nucleus in L929 cells. **C**, miR-709 precursor up regulates miR-709 in nucleus in HEK 293T cells.
