# Supplementary material
Source: PubMed Central journal article supplement (PMC3292299)
Supplement: cr2011137x5.pdf [file cr2011137x5.pdf]

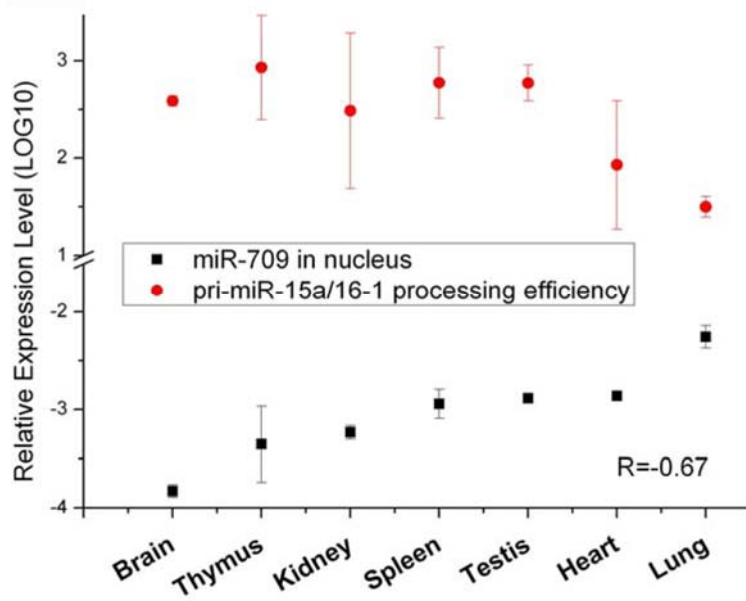

**Supplementary information, Figure S5** The correlation between nuclear miR-709 and pri-miR-15a/16-1 processing efficiency in mice (seven tissues including testis, brain, spleen, thymus, kidney, heart, and lung). R, Pearson correlation coefficient.
