# Supplementary material
Source: PubMed Central journal article supplement (PMC3292299)
Supplement: cr2011137x6.pdf [file cr2011137x6.pdf]

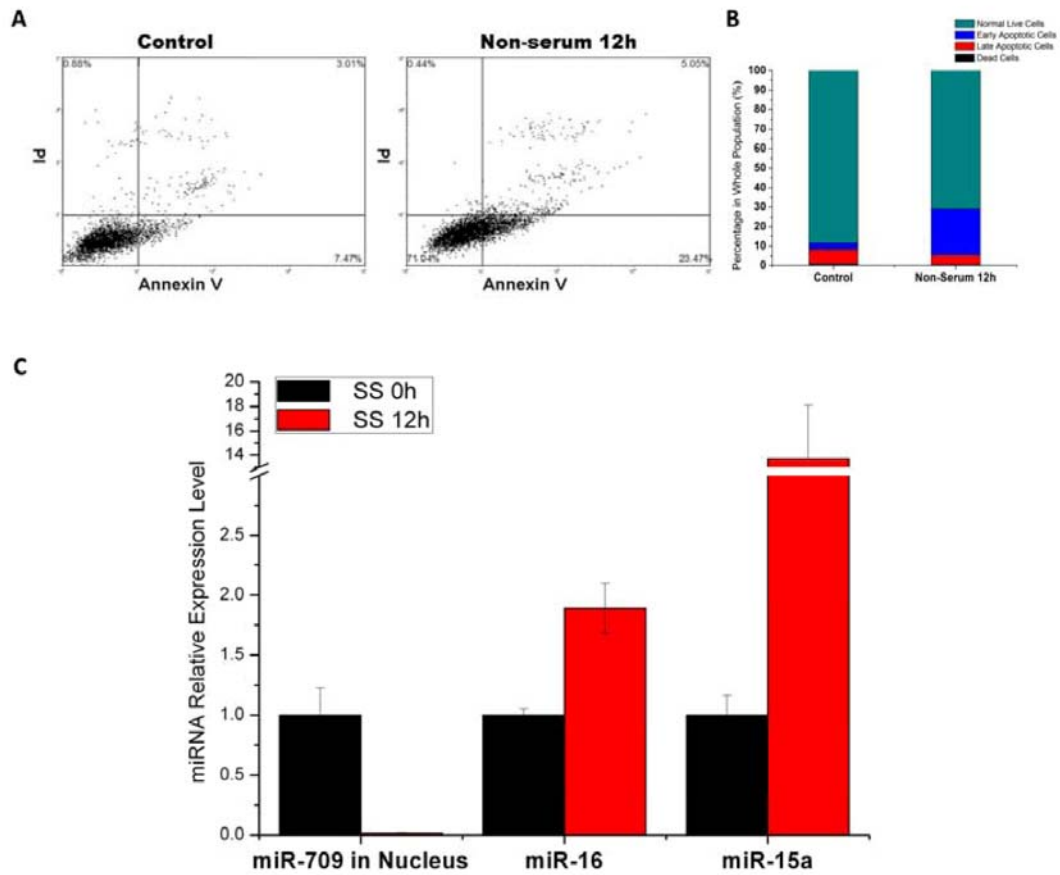

**Supplementary information, Figure S6** Serum starvation (SS) induced apoptotic responses in L929 cells.

**A**, SS induced apoptosis in L929 cells, detected by PI/Annexin-V double staining assay. **B**, alteration of miR-15/miR-16 expression during SS induced cell apoptosis in L929 cells.
