# Supplementary material
Source: PubMed Central journal article supplement (PMC3292299)
Supplement: cr2011137x7.pdf [file cr2011137x7.pdf]

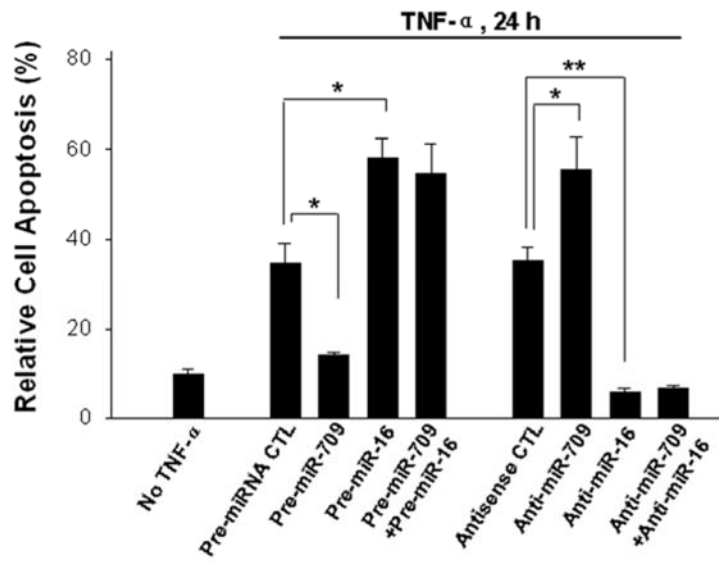

**Supplementary information, Figure S7** TNF- $\alpha$  induced apoptotic responses in L929 cells.

Cells transfected with various oligonucleotides were treated with TNF- $\alpha$  for 24 h and cell apoptosis was detected by PI/Annexin-V double staining and flow cytometry. \*,  $p < 0.05$ ; \*\*,  $p < 0.01$ .
