# Supplementary material
Source: PubMed Central journal article supplement (PMC3292299)
Supplement: cr2011137x8.pdf [file cr2011137x8.pdf]

## Type 1 "No.7 bubble"

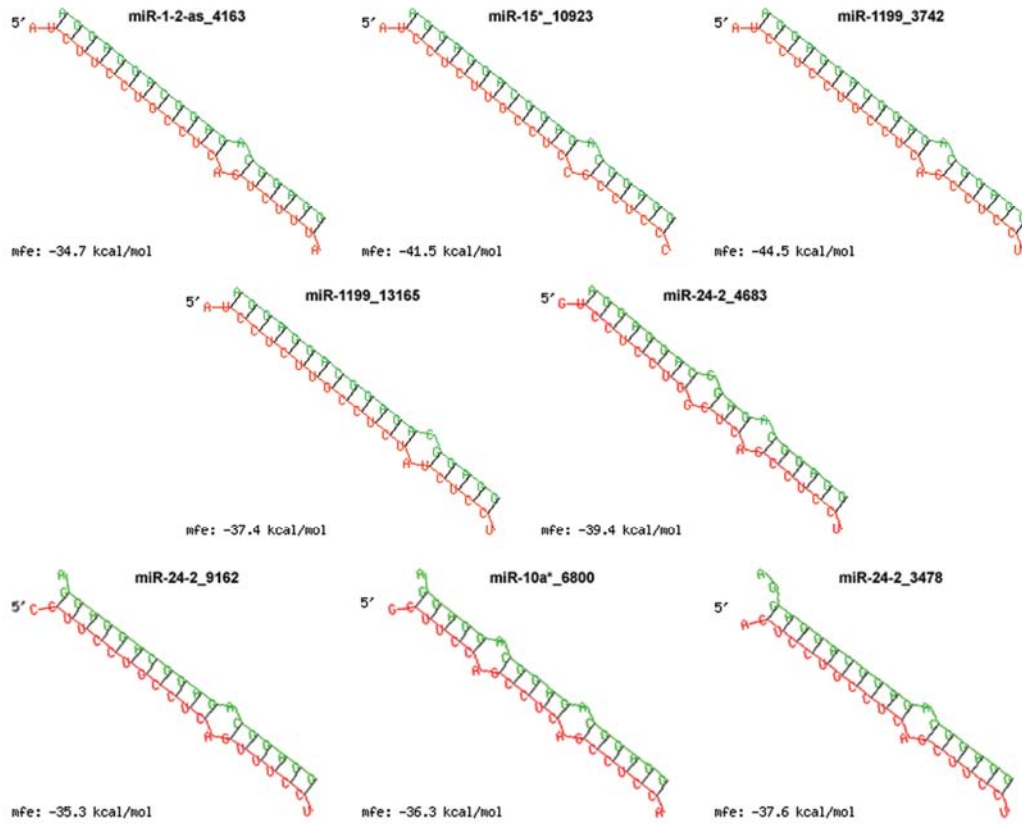

## Type 2 "No.16 bubble"

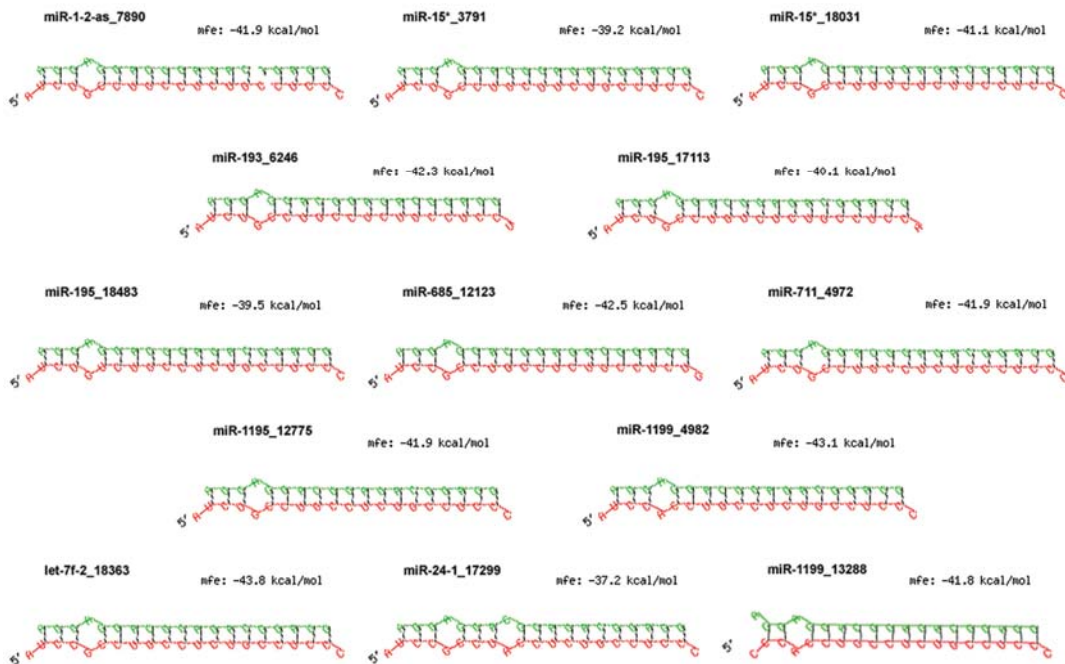

Supplementary information, Figure S8 Predicted various target for miR-709 in mouse.
