# Supplementary material
Source: PubMed Central journal article supplement (PMC3292299)
Supplement: cr2011137x9.pdf [file cr2011137x9.pdf]

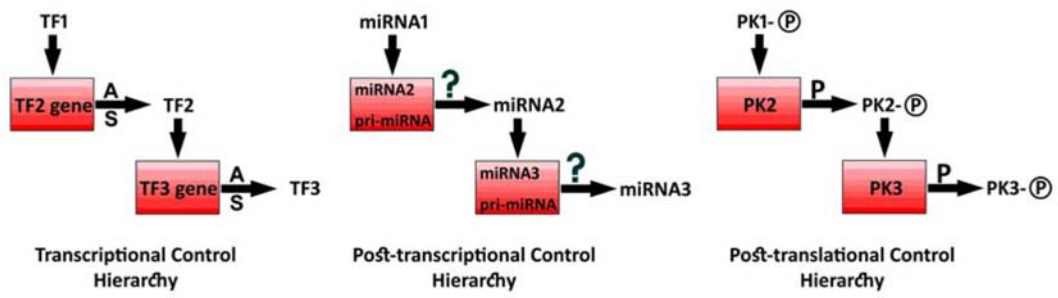

**Supplementary information, Figure S9** A model for the miRNA hierarchy system.

Left, transcriptional factor mediated transcriptional control hierarchy; Middle, microRNA mediated post-transcriptional control hierarchy; Right, protein kinase mediated post-translational control hierarchy. A, activation; S, suppression; P, phosphorylation.
