# Supplementary material
Source: PubMed Central journal article supplement (PMC3292299)
Supplement: cr2011137x11.pdf [file cr2011137x11.pdf]

**Supplemental Table 2.** The predicted miR-709 targets in mouse miRNAs. MiRNAs that have significant changes (fold change>2, P<0.05) after miR-709 overexpression or depletion in L929 cell nucleus were selected and 10kb flanking sequence up or down stream of miRNA gene loci were applied as pri-miRNA. The targets were predicted through RNAhybrid (<http://bibiserv.techfak.uni-bielefeld.de/rnahybrid/>)

| <i>name in sFig. 8B&amp;C</i> | <i>miRNA targets</i> | <i>location (from miRNA gene loci)</i> | <i>pattern of bubbles in sFig. 8B&amp;C</i> | <i>notes</i>   |
|-------------------------------|----------------------|----------------------------------------|---------------------------------------------|----------------|
| miR-1-2-as_4163               | miR-1-2-as           | 5.8kb up stream                        | No.7                                        | <b>Type 1</b>  |
| miR-15*_10923                 | miR-15a*             | 0.8kb down stream                      | No.7                                        | "No.7          |
| miR-1199_3742                 | miR-1199             | 6.3kb up stream                        | No.7                                        | <b>bubble"</b> |
| miR-1199_13165                | miR-1199             | 3kb down stream                        | No.7                                        |                |
| miR-24-2_4683                 | miR-24-2             | 5.6kb up stream                        | No.7&11                                     |                |
| miR-24-2_9162                 | miR-24-2             | 1.1kb up stream                        | No.7&19                                     |                |
| miR-10a*_6800                 | miR-10a*             | 3.2 kb up stream                       | No.7,13&19                                  |                |
| miR-24-2_3478                 | miR-24-2             | 6.8kb up stream                        | No.7,18&19                                  |                |
| miR-1-2-as_7890               | miR-1-2-as           | 2.1kb up stream                        | No.16                                       | <b>Type 2</b>  |
| miR-15*_3791                  | miR-15a*             | 6.2kb up stream                        | No.16                                       | "No.16         |
| miR-15*_18031                 | miR-15a*             | 7.9kb down stream                      | No.16                                       | <b>bubble"</b> |
| miR-193_6246                  | miR-193              | 3.8kb up stream                        | No.16                                       |                |
| miR-195_17113                 | miR-195              | 6.7kb down stream                      | No.16                                       |                |
| miR-195_18483                 | miR-195              | 8.1kb down stream                      | No.16                                       |                |
| miR-685_12123                 | miR-685              | 2kb down stream                        | No.16                                       |                |

|                |           |                   |                  |                      |
|----------------|-----------|-------------------|------------------|----------------------|
| miR-711_4972   | miR-711   | 5kb up stream     | No.16            |                      |
| miR-1195_12775 | miR-1195  | 2.7kb down stream | No.16            |                      |
| miR-1199_4982  | miR-1199  | 5kb up stream     | No.16            |                      |
| let-7f-2_18363 | let-7f-2  | 8.3kb down stream | No.16            |                      |
| miR-24-1_17299 | miR-24-1  | 6.5kb down stream | No.16&12         |                      |
| miR-1199_13288 | miR-1199  | 3.2kb down stream | No.16&19         |                      |
| miR-24-2_7426  | miR-24-2  | 2.9kb up stream   | none             | <b><i>Others</i></b> |
| let-7f-1_5551  | let-7f-1  | 4.8kb up stream   | none             |                      |
| miR-1199_13755 | miR-1199  | 3.6kb down stream | No.19            |                      |
| miR-711_15684  | miR-711   | 5.6kb down stream | No.3,18&19       |                      |
| let-7c-1*_7880 | let-7c-1* | 2.8kb up stream   | No.3,12&19       |                      |
| miR-24-1_1944  | miR-24-1  | 8.8kb up stream   | No.1,16,17,18&19 |                      |
